# Supplementary material for: Downscaling satellite-derived soil moisture in the Three North region using ensemble machine learning and multiple-source knowledge integration
Source: Copernicus journal article supplement (doi:10.5194/hess-2024-129), 2024-05-08
Supplement: Supplementary file 1 [file hess-2024-129-supplement.pdf]

# Supplementary materials for: “Downscaling satellite-derived soil moisture in the Three North region using ensemble machine learning and multiple-source knowledge integration”

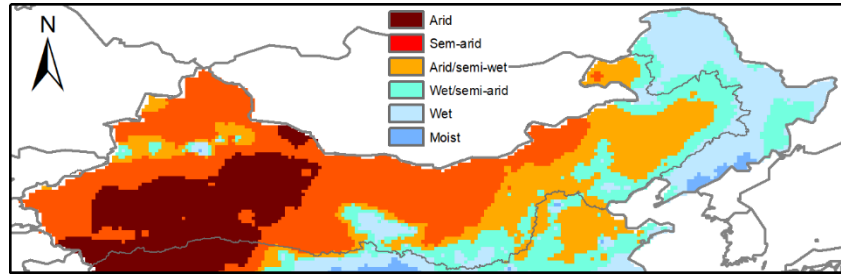

Figure S1. Climate zones across Northern China are delineated based on the China Humidity Index map, a product of the National Earth System Science Data Center, National Science & Technology Infrastructure of China.

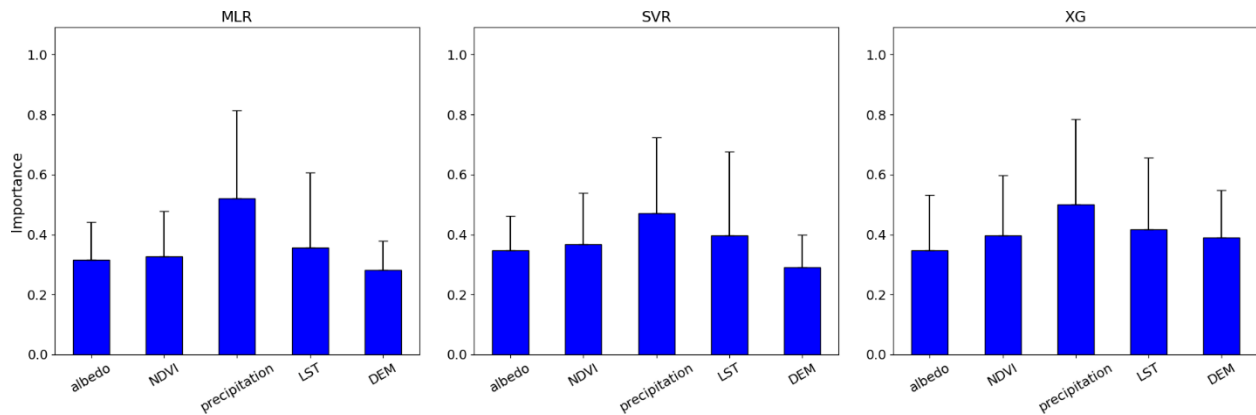

Figure S2. Average (blue bar) and standard deviation (error bar) of permutation-based importance of explanatory variables for soil moisture: comparison across multiple linear regression (MLR), support vector regression (SVR), and extreme gradient XG Boost (XG).

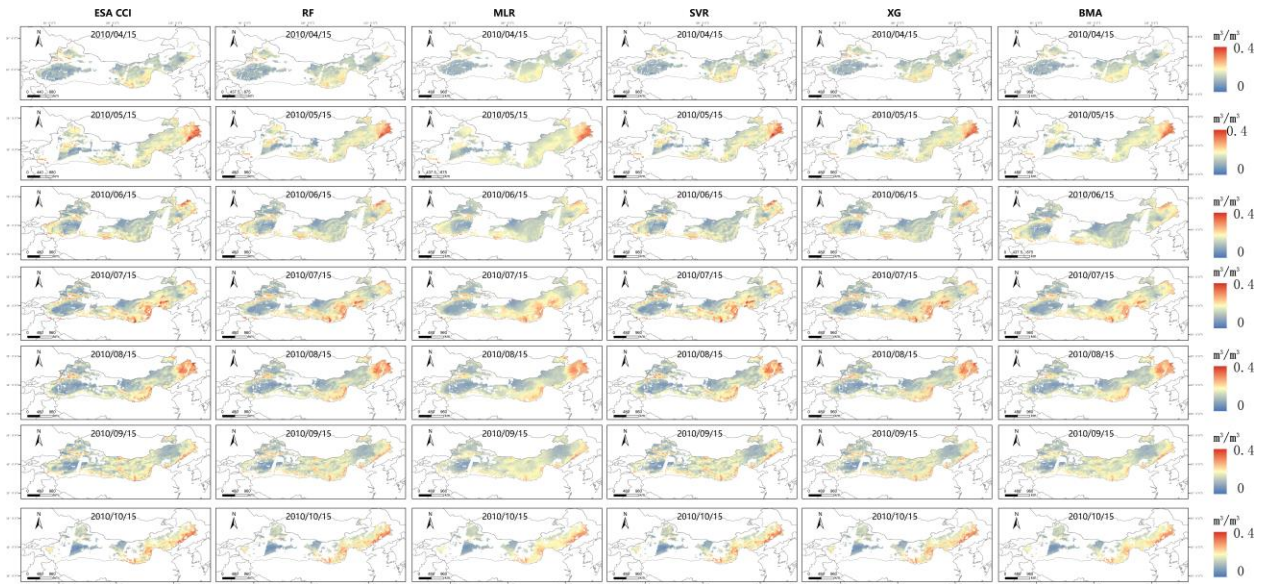

Figure S3. Spatial distribution of soil moisture across six data sources, representing the 15th day of April-October 2010. Columns, from left to right, show the 25-km ESA CCI soil moisture and the 1-km downscaled soil moisture derived from random forest (RF), multiple linear regression (MLR), support vector regression (SVR), extreme gradient XG Boost (XG), and Bayesian model averaging (BMA), respectively.

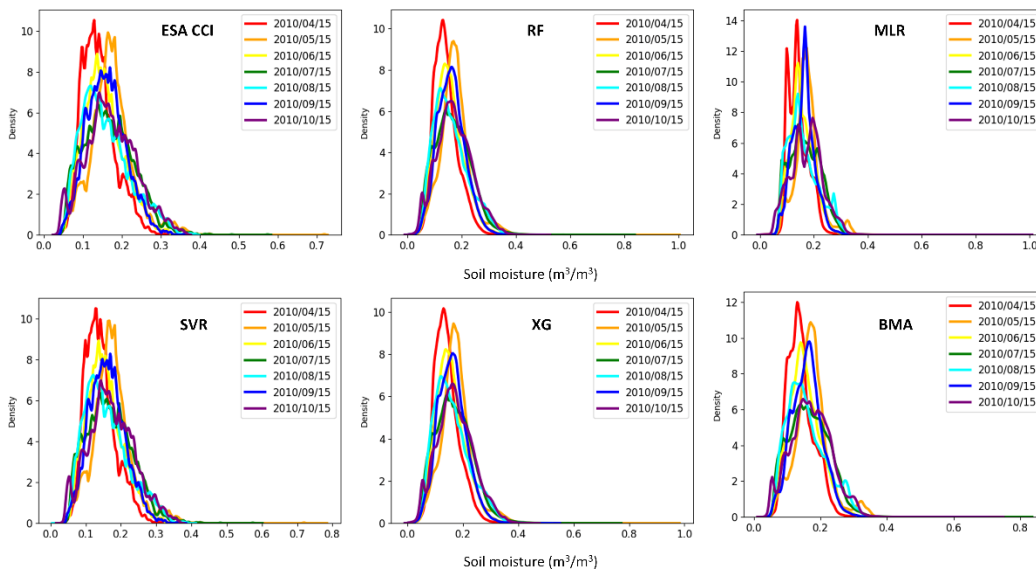

Figure S4. Histograms depicting soil moisture data on the 15th day of April-October 2010. Histograms show the comparison between 25-km ESA CCI soil moisture and 1-km downscaled soil moisture using random forest (RF), multiple linear regression (MLR), support vector regression (SVR), extreme gradient XG Boost (XG), and Bayesian model averaging (BMA).

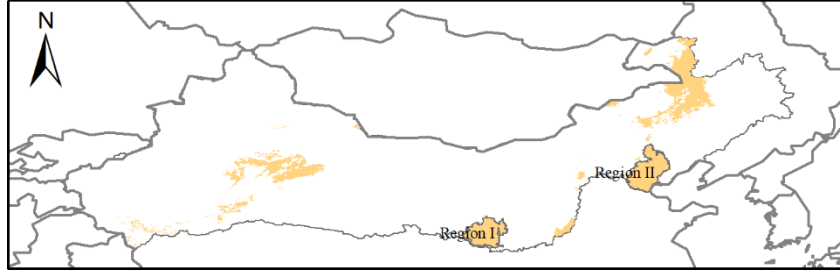

Figure S5. Delineation of typical arid zones based on the Palmer Drought Severity Index (PDSI) and highlights two priority arid zones, namely Region I and Region II.

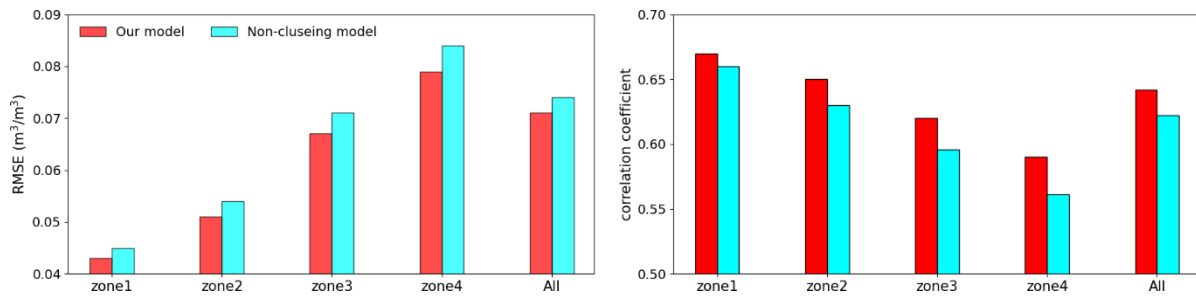

Figure S6. Comparison of accuracy between our proposed model and a model without clustering before fitting, for four divided zones and all regions.

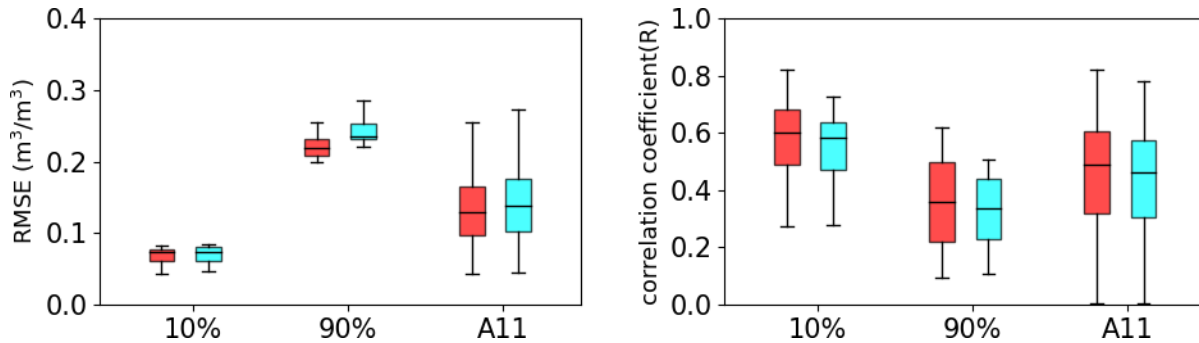

Figure S7. Average model accuracy for our proposed model (red) and the global model without spatiotemporal searching window (cyan) across all sites, considering 10% and 90% soil moisture quantiles.

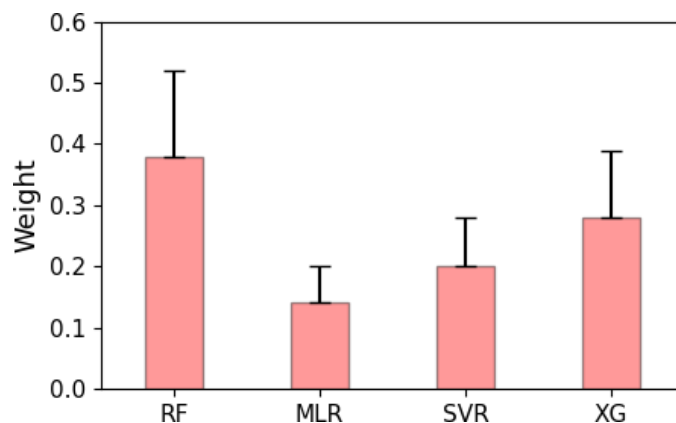

Figure S8. Average (blue bar) and standard deviation (error bar) of weights assigned to random forest (RF), multiple linear regression (MLR), support vector regression (SVR), and extreme gradient XG Boost (XG) in Bayesian model averaging.

Table S1. Information of Chinese Crop Growth and Development and Soil Moisture in Agricultural Land Dataset

| Stations | Longitude | Latitude | Stations | Longitude | Latitude |
|----------|-----------|----------|----------|-----------|----------|
| 50525    | 119.75E   | 49.15N   | 53646    | 109.7E    | 38.23N   |
| 50658    | 125.88E   | 48.05N   | 53663    | 111.81E   | 38.93N   |
| 50739    | 123.18E   | 47.33N   | 53665    | 111.65E   | 38.28N   |
| 50742    | 124.48E   | 47.8N    | 53704    | 105.18E   | 37.53N   |
| 50755    | 126.1E    | 47.6N    | 53705    | 105.67E   | 37.48N   |
| 50756    | 126.97E   | 47.43N   | 53707    | 105.25E   | 36.93N   |
| 50844    | 123.42E   | 46.4N    | 53723    | 107.4E    | 37.78N   |
| 50851    | 126.1E    | 46.68N   | 53725    | 107.58E   | 37.58N   |
| 50854    | 125.32E   | 46.38N   | 53754    | 110.21E   | 37.5N    |
| 50867    | 127.35E   | 46.08N   | 53759    | 110.81E   | 37N      |
| 50928    | 120.33E   | 45.07N   | 53764    | 111.1E    | 37.5N    |
| 50934    | 121.55E   | 45.4N    | 53769    | 111.76E   | 37.25N   |
| 50936    | 122.83E   | 45.63N   | 53777    | 112.15E   | 37.53N   |
| 50945    | 124.27E   | 45.5N    | 53806    | 105.65E   | 36.57N   |
| 50946    | 124.83E   | 45.18N   | 53810    | 105.91E   | 36.98N   |
| 50949    | 124.87E   | 45.08N   | 53817    | 106.26E   | 36N      |
| 50953    | 126.77E   | 45.75N   | 53821    | 107.3E    | 36.58N   |

|       |         |        |       |         |        |
|-------|---------|--------|-------|---------|--------|
| 50954 | 125.08E | 45.5N  | 53845 | 109.5E  | 36.6N  |
| 50955 | 126.3E  | 45.38N | 53853 | 110.95E | 36.7N  |
| 50958 | 126.95E | 45.52N | 53857 | 110.18E | 36.07N |
| 51076 | 88.08E  | 47.73N | 53859 | 110.18E | 36.1N  |
| 51133 | 83E     | 46.73N | 53863 | 111.93E | 37.05N |
| 51238 | 82.06E  | 44.9N  | 53868 | 111.5E  | 36.06N |
| 51334 | 82.9E   | 44.62N | 53881 | 106.48E | 37.28N |
| 51346 | 84.66E  | 44.43N | 53903 | 105.71E | 35.96N |
| 51352 | 85.25E  | 44.85N | 53906 | 105.72E | 35.52N |
| 51353 | 86.1E   | 45.02N | 53908 | 105.4E  | 35.11N |
| 51358 | 85.81E  | 44.28N | 53914 | 106.12E | 35.62N |
| 51359 | 86.2E   | 44.32N | 53915 | 106.67E | 35.55N |
| 51368 | 87.43E  | 44.01N | 53916 | 106.32E | 35.5N  |
| 51379 | 89.57E  | 44.02N | 53923 | 107.63E | 35.73N |
| 51431 | 81.33E  | 43.95N | 53924 | 107.4E  | 35.15N |
| 51436 | 83.3E   | 43.45N | 53925 | 107.18E | 35.68N |
| 51437 | 81.13E  | 43.15N | 53926 | 107.71E | 35.4N  |
| 51463 | 87.62E  | 43.78N | 53930 | 107.98E | 36.45N |
| 51469 | 87.12E  | 43.28N | 53937 | 108E    | 35.42N |
| 51572 | 89.25E  | 42.83N | 53938 | 108.33E | 35.11N |
| 51573 | 89.2E   | 42.93N | 53941 | 109.58E | 35.18N |
| 51628 | 80.23E  | 41.16N | 53942 | 109.5E  | 35.81N |
| 51629 | 80.23E  | 41.27N | 53948 | 109.58E | 34.95N |
| 51642 | 84.25E  | 41.78N | 53955 | 110.45E | 35.46N |
| 51644 | 82.95E  | 41.72N | 53956 | 110.83E | 35.4N  |
| 51656 | 86.13E  | 41.75N | 54026 | 120.9E  | 44.57N |
| 51709 | 75.98E  | 39.47N | 54027 | 119.4E  | 43.83N |
| 51716 | 78.57E  | 39.8N  | 54049 | 123.97E | 44.25N |
| 51730 | 81.05E  | 40.5N  | 54064 | 125.16E | 44.41N |
| 51777 | 88.17E  | 39.03N | 54069 | 125.8E  | 44.17N |

|       |         |        |       |         |        |
|-------|---------|--------|-------|---------|--------|
| 51810 | 77.63E  | 38.92N | 54072 | 126.51E | 44.81N |
| 51811 | 77.27E  | 38.43N | 54076 | 126.93E | 44.42N |
| 51828 | 79.93E  | 37.13N | 54080 | 127.15E | 44.9N  |
| 51855 | 85.55E  | 38.15N | 54102 | 116.12E | 43.95N |
| 51931 | 81.66E  | 36.86N | 54134 | 121.28E | 43.6N  |
| 52101 | 93E     | 43.6N  | 54135 | 122.27E | 43.6N  |
| 52203 | 93.52E  | 42.82N | 54154 | 124.3E  | 43.35N |
| 52418 | 94.68E  | 40.15N | 54156 | 124.8E  | 43.52N |
| 52533 | 98.48E  | 39.77N | 54213 | 119.03E | 42.95N |
| 52546 | 99.83E  | 39.37N | 54218 | 118.97E | 42.27N |
| 52652 | 100.43E | 38.93N | 54223 | 120.65E | 42.85N |
| 52656 | 100.82E | 38.45N | 54236 | 122.53E | 42.42N |
| 52674 | 101.96E | 38.23N | 54237 | 121.65E | 42.03N |
| 52679 | 102.66E | 37.91N | 54243 | 124.12E | 42.78N |
| 52681 | 103.08E | 38.63N | 54304 | 115.28E | 40.96N |
| 52737 | 97.37E  | 37.37N | 54305 | 115.28E | 41.9N  |
| 52749 | 99.58E  | 37.08N | 54308 | 116.63E | 41.22N |
| 52765 | 101.61E | 37.38N | 54311 | 117.75E | 41.93N |
| 52784 | 102.9E  | 37.48N | 54318 | 117.73E | 41.31N |
| 52797 | 104.05E | 37.18N | 54319 | 118.66E | 41N    |
| 52818 | 94.9E   | 36.42N | 54324 | 120.45E | 41.55N |
| 52825 | 96.41E  | 36.43N | 54326 | 119.7E  | 41.38N |
| 52836 | 98.1E   | 36.3N  | 54333 | 122.8E  | 41.98N |
| 52853 | 100.98E | 36.92N | 54335 | 122.01E | 41.68N |
| 52855 | 101.08E | 36.75N | 54337 | 121.12E | 41.13N |
| 52856 | 100.62E | 36.27N | 54404 | 115.83E | 40.9N  |
| 52863 | 101.95E | 36.82N | 54405 | 115.5E  | 40.4N  |
| 52868 | 101.43E | 36.03N | 54408 | 115.21E | 40.38N |
| 52876 | 102.85E | 36.32N | 54416 | 116.87E | 40.38N |
| 52885 | 103.25E | 36.75N | 54420 | 117.33E | 40.93N |

|       |         |        |       |         |        |
|-------|---------|--------|-------|---------|--------|
| 52895 | 104.68E | 36.56N | 54423 | 117.93E | 40.97N |
| 52896 | 104.18E | 36.55N | 54425 | 117.48E | 40.41N |
| 52980 | 103.3E  | 35.97N | 54429 | 117.95E | 40.2N  |
| 52983 | 104.15E | 35.87N | 54430 | 118.15E | 40.76N |
| 52984 | 103.18E | 35.58N | 54431 | 116.63E | 39.92N |
| 52985 | 103.35E | 35.43N | 54432 | 118.48E | 40.6N  |
| 52986 | 103.86E | 35.36N | 54434 | 118.3E  | 40.15N |
| 52993 | 105.08E | 35.68N | 54437 | 118.66E | 39.5N  |
| 52995 | 104.6E  | 35.53N | 54439 | 118.71E | 40N    |
| 53289 | 113.85E | 42.25N | 54452 | 119.82E | 40.8N  |
| 53357 | 110.05E | 41.03N | 54454 | 120.35E | 40.35N |
| 53368 | 111.45E | 41.1N  | 54502 | 115.96E | 39.48N |
| 53378 | 112.61E | 41.3N  | 54506 | 115.85E | 39.33N |
| 53384 | 113.18E | 41.45N | 54510 | 116.98E | 39.88N |
| 53392 | 114.6E  | 41.85N | 54512 | 116.28E | 39.43N |
| 53397 | 113.95E | 41.06N | 54515 | 116.7E  | 39.5N  |
| 53399 | 114.7E  | 41.15N | 54518 | 116.38E | 39.12N |
| 53420 | 107.13E | 40.9N  | 54519 | 116.48E | 39.31N |
| 53433 | 108.65E | 40.73N | 54520 | 117.08E | 39.96N |
| 53455 | 110.53E | 40.55N | 54521 | 116.98E | 39.76N |
| 53464 | 111.15E | 40.68N | 54522 | 117.73E | 39.88N |
| 53478 | 112.45E | 40N    | 54525 | 117.28E | 39.7N  |
| 53483 | 113.86E | 40.88N | 54531 | 118.75E | 39.73N |
| 53486 | 113.77E | 40.37N | 54532 | 118.1E  | 39.8N  |
| 53487 | 113.33E | 40.1N  | 54533 | 118.12E | 39.55N |
| 53491 | 114.4E  | 40.68N | 54534 | 118.15E | 39.67N |
| 53492 | 114.16E | 40.11N | 54539 | 118.9E  | 39.42N |
| 53498 | 115.03E | 40.56N | 54540 | 119.16E | 39.71N |
| 53505 | 105.38E | 39.08N | 54612 | 116.45E | 38.86N |
| 53513 | 107.4E  | 40.77N | 54619 | 116.91E | 38.91N |

|       |         |        |       |         |        |
|-------|---------|--------|-------|---------|--------|
| 53547 | 109.03E | 39.1N  | 54636 | 116.1E  | 38.98N |
| 53553 | 110.86E | 39.66N | 56092 | 104.65E | 35N    |
| 53564 | 111.15E | 39.38N | 57002 | 105.67E | 34.87N |
| 53578 | 112.43E | 39.3N  | 57004 | 104.88E | 34.73N |
| 53593 | 114.57E | 39.83N | 57006 | 105.75E | 34.58N |
| 53611 | 106.55E | 38.91N | 57012 | 106.2E  | 34.98N |
| 53614 | 106.22E | 38.48N | 57025 | 107.38E | 34.51N |
| 53615 | 106.68E | 38.81N | 57030 | 108.15E | 34.7N  |
| 53618 | 106.23E | 38.25N | 57033 | 108.82E | 34.55N |
| 53619 | 106.3E  | 38.12N | 57034 | 109.91E | 34.88N |

Table S2. Hyperparameters selection ranges of machine learning models

| Model                          | Hyperparameters             | Represents                                                                                           | List values for tuning                 |
|--------------------------------|-----------------------------|------------------------------------------------------------------------------------------------------|----------------------------------------|
| Random Forest (RF)             | n_estimators                | number of trees                                                                                      | [50, 100, 200]                         |
|                                | max_depth                   | maximum depth of each tree                                                                           | [None, 5, 10, 15]                      |
|                                | min_samples_split           | minimum number of samples required to split an internal node                                         | [2, 5, 10]                             |
|                                | min_samples_leaf            | minimum number of samples required to be in a leaf node                                              | [1, 2, 4]                              |
| Support Vector Machine (SVR)   | kernel                      | type of decision boundary                                                                            | [Radial basis function (RBF), Sigmoid] |
|                                | C                           | trade-off between achieving a smooth decision boundary and classifying the training points correctly | [0.1, 0.3, 1, 3, 10, 100]              |
| Extreme gradient boosting (XG) | n_estimators                | number of decision trees                                                                             | [50, 1000]                             |
|                                | max depth                   | Maximum depth of the tree                                                                            | [3, 10]                                |
|                                | learning rate               | Shrinkage factors                                                                                    | [0.01, 0.3]                            |
|                                | subsample                   | The proportion of training sub-samples                                                               | [0.5, 1.0]                             |
|                                | colsample bytree            | Column sampling                                                                                      | [0.5, 1.0]                             |
|                                | gamma                       | Regularization parameter of T                                                                        | [0, 5]                                 |
|                                | reg-alpha                   | L1 regularization parameter                                                                          | [0, 3]                                 |
| reg-lambda                     | L2 regularization parameter | [0, 3]                                                                                               |                                        |
